# Supplementary material for: Utility of Blood-Based Tau Biomarkers for Mild Cognitive Impairment and Alzheimer’s Disease: Systematic Review and Meta-Analysis
Source: MDPI journal article supplement (doi:10.3390/cells12081184), 2023-04-18
Supplement: s1 [file s1]

### Supplementary Tables and figures

| Study (cohort)               | Type of tau | AD* (n)          | MCI* (n)         | CU (n)              | Technology used |
|------------------------------|-------------|------------------|------------------|---------------------|-----------------|
| Chen 2020                    | p-tau181    | 37.94±14.04 (18) | 23.19±9.02 (23)  | 32.4± 10.39 (24)    | ELISA           |
| Jiao 2015                    | p-tau181    | 150±57.7 (156)   | nd               | 107±57.8 (129)      | ELISA           |
| Tsai 2020                    | p-tau181    | 3.8± 0.7 (19)    | 3.7± 0.73 (24)   | 3.4± 0.63 (10)      | IMR             |
| Hasegawa 2020                | p-tau181    | 9.3±3.24 (12)    | 5.33± 1.59 (12)  | 4.49±2.12 (9)       | IMR             |
| Tsai 2019                    | p-tau181    | 4.09±0.94 (37)   | 3.82±0.71 (40)   | 3.53±0.55 (13)      | IMR             |
| Yang 2018                    | p-tau181    | 6.14±1.59 (21)   | 4.41±1.85 (29)   | 2.46±1.09 (23)      | IMR             |
| Barthelemy 2020              | p-tau181    | nd               | 2.9± 1 (24)      | 2.1±0.7 (31)        | LC-MS           |
| Zettergren 2021              | p-tau181    | 23.6±8.2 (148)   | 18.3±11.0 (434)  | 14.9±8.7 (236)      | SIMOA           |
| Karikari 2021                | p-tau181    | 25.5±8.6 (137)   | 22.8±9.9(209)    | 14.2±9 (268)        | SIMOA           |
| Simren 2021                  | p-tau181    | 19.43±7.57 (103) | 13.13±6.21 (107) | 8.85± 4.45 (99)     | SIMOA           |
| Ashton 2021                  | p-tau181    | 25.21±7.8 (42)   | 16.26±6.7 (54)   | 10.91± 3.3 (159)    | SIMOA           |
| Brickman (pathological) 2021 | p-tau181    | 1.93± 1.14 (33)  | nd               | 1.06±0.81 (80)      | SIMOA           |
| Brickman (clinical) 2021     | p-tau181    | 1.24±1.09 (131)  | nd               | 0.86±0.73 (169)     | SIMOA           |
| Karikari (BioFINDER-2) 2020  | p-tau181    | 19.2±9.4 (126)   | 12.5±8.6 (191)   | 9.4±6 (337)         | SIMOA           |
| Karikari (TRIAD) 2020        | p-tau181    | 25±7.8 (33)      | 15.6±5.6 (28)    | 9.3±2.9 (91)        | SIMOA           |
| O'Connor 2020                | p-tau181    | 23.7±10.5 (19)   | nd               | 9.7±9.3 (27)        | SIMOA           |
| Benussi 2020                 | p-tau181    | 16.4± 8.7(63)    | nd               | 5.4± 1(63)          | SIMOA           |
| Lantero 2020                 | p-tau181    | 28.4±9.6 (77)    | nd               | 9.3± 9.4 (28)       | SIMOA           |
| Palmqvist 2020               | p-tau181    | 2.87± 4.28 (34)  | nd               | 2.52± 2.41 (47)     | SIMOA           |
| Mielke 2018                  | p-tau181    | 11.6±4.1 (40)    | 9±13.9 (57)      | 6.4±6.4 (172)       | SIMOA           |
| Tatebe 2017                  | p-tau181    | 0.171±0.166 (20) | nd               | 0.0405±0.075 6 (15) | SIMOA           |

|                              |          |                    |                          |                     |             |
|------------------------------|----------|--------------------|--------------------------|---------------------|-------------|
| Barthelemy 2020              | p-tau217 | nd                 | 0.31±0.16 (24)           | 0.07±0.03 (31)      | LC-MS       |
| Palmqvist 2020               | p-tau217 | 7.75±5.34 (34)     | nd                       | 1.79±1.95 (47)      | MSD-ECL     |
| Mattsson 2020                | p-tau217 | nd                 | 4.16±3.11 (49)           | 1.18±1.64 (88)      | MSD-ECL     |
| Brickman (pathological) 2021 | p-tau217 | 0.51±0.4 (33)      | nd                       | 0.19± 0.16 (80)     | SIMOA       |
| Brickman (clinical) 2021     | p-tau217 | 0.32±0.32 (131)    | nd                       | 0.18±0.17 (169)     | SIMOA       |
| Ashton 2021                  | p-tau231 | 29.22±8.2 (42)     | 19.45±7.1 (54)           | 14.94±4.1 (159)     | SIMOA       |
| Palmqvist (BioFINDER) 2019   | t-tau    | 16.7±6 (64)        | 19.1±5.2 (265)           | 16.6±4.7 (513)      | Elecsys-ECL |
| Palmqvist (Germany) 2019     | t-tau    | 15.3±4.5 (94)      | 14.2±4.7 (109)           | 13.8±4 (34)         | Elecsys-ECL |
| Nam 2020                     | t-tau    | 351.9±223.8 (20)   | 263± 37.12 (30)          | 245.6±33.76 (26)    | ELISA       |
| Chen 2020                    | t-tau    | 303.85±257.5 (18)  | 90.56±26.92 (23)         | 132.47± 30.01 (24)  | ELISA       |
| Neergaard (tau-A) 2018       | t-tau    | 25.8±19.7 (232)    | nd                       | 26.8±14.5 (4771)    | ELISA       |
| Neergaard (tau-C) 2018       | t-tau    | 19.7±12.7 (232)    | nd                       | 20.3±10.4 (4771)    | ELISA       |
| Rani 2017                    | t-tau    | 451.76±240.82 (45) | nd                       | 836.93± 369.31 (45) | ELISA       |
| Jiao 2015                    | t-tau    | 227.1±102.2 (156)  | nd                       | 181±103.2 (129)     | ELISA       |
| de Vos 2015                  | t-tau    | 40.2±63.1 (20)     | 17.7 (10.3, 26.2) (20) † | 24.6±33.6 (29)      | ELISA       |
| Wang 2014                    | t-tau    | 213.95±44.57 (97)  | 209.61±39.65 (51)        | 214.94±43.23 (122)  | ELISA       |
| Sparks 2012                  | t-tau    | 530±193.6 (49)     | 729.8±225.6 (47)         | 819.5±294.4 (110)   | ELISA       |
| Chiu (validation) 2020       | t-tau    | 40.9±14.4 (73)     | 30.5±11.1 (33)           | 20.2±10.5 (134)     | IMR         |
| Chiu (derivation) 2020       | t-tau    | 47.47±19.1 (59)    | 33.33±7.7 (34)           | 13.83±6.5 (67)      | IMR         |
| Jiao 2020                    | t-tau    | 25.91± 8.12 (40)   | nd                       | 20.65±3.52 (57)     | IMR         |
| Tsai 2020                    | t-tau    | 26.4± 4.2 (19)     | 23.7± 3.7 (24)           | 23± 3.5 (10)        | IMR         |

|                              |       |                   |                  |                  |       |
|------------------------------|-------|-------------------|------------------|------------------|-------|
| Hasegawa 2020                | t-tau | 20.3±7.04 (12)    | 13± 3.05 (12)    | 12± 4.59 (9)     | IMR   |
| Tsai 2019                    | t-tau | 27.1±4.8 (37)     | 24.5±4 (40)      | 22.5±3.4 (13)    | IMR   |
| Fan 2018                     | t-tau | 39.4±5.8 (16)     | 29.7±8.7 (25)    | 14.3±6.4 (39)    | IMR   |
| Yang 2018                    | t-tau | 37.54±12.29 (21)  | 32.98±10.18 (29) | 18.85±10.16 (23) | IMR   |
| Yang 2017                    | t-tau | 72.2±9.9 (29)     | 33.33±7.77 (24)  | 13.37±7.77 (66)  | IMR   |
| Lue (USA) 2017               | t-tau | 34.52±15 (16)     | nd               | 20.48±4.96 (16)  | IMR   |
| Lue (Taiwan) 2017            | t-tau | 52.47±15.14 (31)  | nd               | 13.98±14.76 (61) | IMR   |
| Lee 2017                     | t-tau | 47.5±18.9 (62)    | nd               | 15± 7.3 (34)     | IMR   |
| Chiu 2014                    | t-tau | 53.9±11.7 (10)    | 32.7±5.8 (20)    | 15.6±6.9 (30)    | IMR   |
| Tzen 2014                    | t-tau | 46.7±2(14)        | 33.5±2.2 (11)    | 13.5±5.5 (20)    | IMR   |
| Chiu 2013                    | t-tau | 73.01±139.38 (30) | 55.57±22.87 (31) | 16.16±9.09 (107) | IMR   |
| Barthelemy 2020              | t-tau | nd                | 22.7±6.9 (24)    | 20.4±6.3 (31)    | LC-MS |
| Palmkvist 2020               | t-tau | 3.74± 2.23 (34)   | nd               | 2.45±1.81 (47)   | SIMOA |
| Hsu 2021                     | t-tau | 2.80±1.50 (55)    | nd               | 1.80±0.9 (22)    | SIMOA |
| Simren 2021                  | t-tau | 3.21±2.48 (103)   | 2.69±1.08 (107)  | 2.36± 1.07 (99)  | SIMOA |
| Deniz 2021                   | t-tau | 3.75±2.36 (159)   | nd               | 3.84± 2.26 (162) | SIMOA |
| Brickman (pathological) 2021 | t-tau | 4.12±2.37 (33)    | nd               | 4.3±3.22 (80)    | SIMOA |
| Brickman (clinical) 2021     | t-tau | 4.9± 2.06 (131)   | nd               | 4.94±2.13 (169)  | SIMOA |
| Startin 2020                 | t-tau | 2.272±4.542 (27)  | nd               | 2.38± 2.526 (27) | SIMOA |
| Fossati 2020                 | t-tau | 3.67±1.06 (29)    | nd               | 2.74± 0.76 (68)  | SIMOA |
| Pase 2019                    | t-tau | 4.91±1.69 (132)   | nd               | 4.36±2.19 (1321) | SIMOA |

|                                    |       |                    |                    |                    |       |
|------------------------------------|-------|--------------------|--------------------|--------------------|-------|
| Li 2019                            | t-tau | 5.47±2.69 (53)     | 6.68±4.03 (22)     | 4.62±0.5 (9)       | SIMOA |
| Chen<br>(discovery -<br>FL) 2019   | t-tau | 3.13±5.95 (25)     | 2.96±4.52 (20)     | 2.75±5.32 (19)     | SIMOA |
| Chen<br>(validation -<br>NT1) 2019 | t-tau | 3.4±0.29 (23)      | 3.42±0.23 (22)     | 2.36±0.17 (41)     | SIMOA |
| Mielke 2018                        | t-tau | 7.2±2.8 (40)       | 5.9±2.8 (57)       | 5.9±1.9 (172)      | SIMOA |
| Mattsson<br>(ADNI) 2016            | t-tau | 3.13±1.50<br>(179) | 2.71±1.32<br>(195) | 2.58±1.19<br>(189) | SIMOA |
| Zetterberg<br>2013                 | t-tau | 8.8±10.1 (54)      | 4.68±4.25 (75)     | 4.43±2.83 (25)     | SIMOA |

**Table S1.** Plasma biomarker data extracted from studies included in the data synthesis. Studies are identified by the first author's name, the name of the cohort within the study, if applicable, and ordered chronologically by year of publication. \*Data presented as mean±SD pg/ml unless specified otherwise. †Data provided as median (IQR). n: number of patients. AD: Alzheimer's disease; MCI: mild cognitive impairment; CU: cognitively unimpaired; nd: No data; SD: standard deviation; IQR: interquartile range; IMR: immunomagnetic reduction; ELISA: enzyme-linked immunosorbent assay; SIMOA: single molecule array; LC-MS: Liquid chromatography-mass spectrometry; MSD: Meso Scale Discovery.

| Assay type  | Study                                  | Tau type | Assay details                                                                                                                                      |
|-------------|----------------------------------------|----------|----------------------------------------------------------------------------------------------------------------------------------------------------|
| Elecsys-ECL | Palmqvist <i>et al.</i> , 2019         | t-tau    | Elecsys immunoassay (Roche diagnostics). Measured on Cobas e 601 analyzer (Roche Diagnostics)                                                      |
| MSD-ECL     | Mattsson-Carlgren <i>et al.</i> , 2020 | p-tau217 | Biotinylated-IBA493 was used as a capture antibody (anti-P-tau217) and SULFO-TAG-4G10-E2 (anti-Tau) for the detector                               |
| SIMOA       | Palmqvist <i>et al.</i> , 2020         | t-tau    | SIMOA tau 2.0 kit (Quanterix). Measured on a SIMOA HD-1 (Quanterix)                                                                                |
| MSD-ECL     |                                        | p-tau181 | Biotinylated-AT270 MAb (Thermo Fisher Scientific Inc.) for capture. SULFO-TAG-LRL (anti-tau mAb; Lilly Research Laboratory) for detection<br>SIMOA |
| MSD-ECL     |                                        | p-tau217 | Biotinylated-IBA493 was used as a capture antibody and SULFO-TAG-4G10-E2 (anti-Tau) as the detector                                                |
| MSD-ECL     | Mielke <i>et al.</i> , 2018            | p-tau181 | Biotinylated-AT270 mAb (Thermo Fisher Scientific Inc.) for capture. MSULFO-TAG-LRL (Lilly Research Laboratory) for detection                       |
| SIMOA       |                                        | t-tau    | SIMOA Tau 2.0 kit (Quanterix). Measured on SIMOA HD-1 (Quanterix)                                                                                  |
| MSD-ECL     | Brickman <i>et al.</i> , 2021          | p-tau217 | IBA493 mAb for capture. SULFO-TAG-Ru-4G10-E2 for detector                                                                                          |
| MSD-ECL     | Brickman <i>et al.</i> , 2021          | p-tau181 | AT270 mAb for capture. SULFO-TAG-Ru-4G10-E2 for detector                                                                                           |
| SIMOA       |                                        | t-tau    | Human Neurology 3-Plex A assay kit (Quanterix). Measured on a SIMOA HD-1 (Quanterix)                                                               |
| SIMOA       | Karikari <i>et al.</i> , 2020          | p-tau181 | AT270 mouse mAb coupled to paramagnetic beads. Tau12 antibody (Merck) for detection. Measured on SIMOA HD-1 (Quanterix)                            |
| SIMOA       | de Wolf <i>et al.</i> , 2020           | t-tau    | Human Neurology 3-Plex A assay (N3PA). Measured on SIMOA HD-1 (Quanterix)                                                                          |
| SIMOA       | Pase <i>et al.</i> , 2019              | t-tau    | SIMOA tau 2.0 kit (Quanterix). Measured on SIMOA HD-1 (Quanterix)                                                                                  |
| SIMOA       | Li <i>et al.</i> , 2019                | t-tau    | Human Neurology 3-Plex A assay kit (Quanterix). Measured on a SIMOA HD-1 (Quanterix)                                                               |
| SIMOA       | Chen <i>et al.</i> , 2019              | t-tau    | Full-length: TauAB (aa 425-441) for capture; NT1 region: BT2 for capture; NT2 region: ADx202 (aa 218-224) for capture. Tau12 (Merck) for detection |
| SIMOA       | Tatebe <i>et al.</i> , 2017            | p-tau181 | Modified Human Total Tau kit (SIMOA Tau 2.0, Quanterix). AT270 mAb (Thermo Fisher Scientific) for detection                                        |
| SIMOA       | Zetterberg <i>et al.</i> , 2013        | t-tau    | Tau-5 mAb (Covance) for capture, HT7 and BT2 mAb (Pierce/Thermo Fisher Scientific) for detection                                                   |
| SIMOA       | Park <i>et al.</i> , 2019              | t-tau    | SIMOA tau 2.0 kit (Quanterix)                                                                                                                      |

| Assay type                | Study                   | Tau type | Assay details                                                                                                                                                          |
|---------------------------|-------------------------|----------|------------------------------------------------------------------------------------------------------------------------------------------------------------------------|
|                           |                         | p-tau181 | Phospho-tau thr181 immunoassay (Quanterix)                                                                                                                             |
| SIMOA                     | Mattsson et al., 2016   | t-tau    | Human total tau kit (Quanterix)                                                                                                                                        |
| SIMOA                     | Startin et al., 2019    | t-tau    | Human total tau kit (Quanterix)                                                                                                                                        |
| SIMOA                     | Fossati et al., 2019    | t-tau    | SIMOA assay using a capture antibody which recognizes amino acid 16-24 and a detector antibody recognizing amino acid 218-222                                          |
| SIMOA                     | Smiren et al., 2020     | t-tau    | Advantage Neuro 3-plex (Quanterix). Measured on a SIMOA HD-1 (Quanterix)                                                                                               |
|                           |                         | p-tau181 | AT270 mouse mAb coupled to paramagnetic beads. Tau12 antibody used for detection. Measured on SIMOA HD-1 (Quanterix)                                                   |
| SIMOA                     | Lantero et al., 2020    | p-tau181 | AT270 mouse mAb coupled to paramagnetic beads. Tau12 antibody used for detection                                                                                       |
| SIMOA                     | Deniz et al. 2021       | t-tau    | Human total tau kit (Quanterix). Analysed on SIMOA HD1-Analyzer (Quanterix, Lexington, MA)                                                                             |
| SIMOA                     | Ashton et al., 2021     | p-tau181 | In-house SIMOA assay. Measured on HD-X instrument (Quanterix)                                                                                                          |
| SIMOA                     | Karikari et al., 2021   | p-tau181 | AT270 mouse mAb coupled to paramagnetic beads. Tau12 antibody used for detection                                                                                       |
| SIMOA                     | O'connor et al., 2021   | p-tau181 | AT270 mouse mAb coupled to paramagnetic beads. N-terminal antibody used for detection                                                                                  |
| SIMOA                     | Zettergren et al., 2021 | p-tau181 | AT270 mouse mAb coupled to paramagnetic beads. Tau12 antibody used for detection                                                                                       |
| ELISA                     | Neergaard et al., 2018  | t-tau    | Solid phase competitive ELISA. MAb detect an ADAM10-generated cleavage site at Ala152 (Tau-A) and the caspase-3-generated cleavage site at Asp421 (Tau-C)              |
| ELISA                     | Sparks et al., 2012     | t-tau    | ELISA. KHB0042 (Invitrogen)                                                                                                                                            |
| ELISA                     | Wang et al., 2014       | t-tau    | ELISA. KHB00412 (Invitrogen)                                                                                                                                           |
|                           |                         | p-tau181 | ELISA. KHO0631 (Invitrogen)                                                                                                                                            |
| ELISA                     | Jiao et al., 2015       | t-tau    | ELISA. KUB0041 (Invitrogen)                                                                                                                                            |
|                           |                         | p-tau181 | ELISA. KUO0631 (Invitrogen)                                                                                                                                            |
| ELISA                     | De Vos et al., 2015     | t-tau    | 77E9 mAb for capture. ADx215 for detection                                                                                                                             |
| ELISA                     | Rani et al. 2017        | t-tau    | Cusabio tau kit (CSB-E12011h)                                                                                                                                          |
| ELISA                     | Nam et al., 2020        | t-tau    | MyBioSource (MBS022635)                                                                                                                                                |
| ELISA (chemiluminescence) | Hasegawa et al. 2020    | t-tau    | MAb recognising aa16-24 for capture. MAb recognising aa218-225 for detection                                                                                           |
|                           |                         | p-tau181 | MAb recognising p-tau181 for capture. MAb recognising aa16-24 for detection                                                                                            |
| IMR                       | Chiu et al., 2020       | t-tau    | T9450 (Sigma) immobilised antibody assay. Measured on a magnetosusceptometer (XacPro-S, MagQu)                                                                         |
| IMR                       | Chiu et al., 2013       | t-tau    | T9450 (Sigma) immobilised antibody assay. Measured on a magnetosusceptometer (XacPro-S, MagQu)                                                                         |
| IMR                       | Chiu et al., 2014       | t-tau    | Dextran coated Fe3O4 magnetic nanoparticles (MF-DEX-0060, MagQu) functionalised against tau with tau-441 (Sigma). Measured on a magnetosusceptometer (XacPro-S, MagQu) |

| Assay type | Study                     | Tau type  | Assay details                                                                                                                                                    |
|------------|---------------------------|-----------|------------------------------------------------------------------------------------------------------------------------------------------------------------------|
| IMR        | Yang et al., 2018         | p-tau181  | Dextran coated Fe <sub>3</sub> O <sub>4</sub> magnetic nanoparticles (MF-DEX-0060, MagQu) functionalised against p-tau181 MN1050 (Thermo Fisher Scientific Inc.) |
|            |                           | t-tau     | Dextran coated nanoparticles functionalized with MF-TAU-0060 (MagQu)                                                                                             |
| IMR        | Fan et al., 2018          | t-tau     | Tau46 (T9450, Sigma) conjugated to dextran-coated magnetic nanoparticles. Analysed on IMR analyser (XacPro-S, MagQu)                                             |
| IMR        | Lue et al., 2017          | t-tau     | Dextran coated nanoparticles functionalized with MF-TAU-0060 (MagQu) and measured on a magnetosusceptometer (XacPro-S, MagQu)                                    |
|            |                           | p-tau181  |                                                                                                                                                                  |
| IMR        | Tsai et al., 2019/ 2020   | t-tau     | Dextran coated nanoparticles functionalized with MF-TAU-0060 (MagQu) and measured on a magnetosusceptometer (XacPro-S, MagQu)                                    |
|            |                           | p-tau181  | Dextran coated nanoparticles functionalized with MF-PT1-0060 (MagQu) and measured on a magnetosusceptometer (XacPro-S, MagQu)                                    |
| IMR        | Jiao et al. 2020          | t-tau     | Dextran coated nanoparticles functionalized with MF-TAU-0060 (MagQu)                                                                                             |
| LC-MS      | Barthelemy et al. (date?) | p-tau 217 | nanoAcquity ultra performance liquid chromatography system (Waters) coupled to an Orbitrap Tribrid Eclipse mass spectrometer (Thermo Fisher Scientific)          |
|            |                           | p-tau181  |                                                                                                                                                                  |
|            |                           | t-tau     |                                                                                                                                                                  |

**Table S2.** Details of assay and methods employed to measure tau in each study. The studies have been grouped by broad categories according to the type of assay used, and these categories have been colour coded. Details of the assays included, where applicable: name of the antibody or reagent, manufacturer, and method of measurement. mAb: monoclonal antibody. SIMOA: single molecule assay. ELISA: enzyme-linked immunosorbent assay. IMR: immunomagnetic reduction. MSD: Meso scale discovery. LC-MS: Liquid chromatography–mass spectrometry.

**A**

| AD       | Assay                    | Effect size | Variance | Standard error | Upper CI | Lower CI | I <sup>2</sup> | n  |
|----------|--------------------------|-------------|----------|----------------|----------|----------|----------------|----|
| p-tau181 | Simoa                    | 2.09        | 0.000    | 0.020          | 2.13     | 2.05     | 99.90          | 13 |
|          | ELISA                    | 1.35        | 0.003    | 0.050          | 1.45     | 1.25     | 99.86          | 2  |
|          | IMR                      | 1.38        | 0.002    | 0.040          | 1.46     | 1.30     | 99.77          | 4  |
| t-tau    | Simoa                    | 1.24        | 0.026    | 0.162          | 1.56     | 0.92     | 99.07          | 14 |
|          | ELISA                    | 1.16        | 0.034    | 0.184          | 1.53     | 0.80     | 99.66          | 10 |
|          | IMR                      | 2.29        | 0.000    | 0.021          | 2.33     | 2.25     | 99.91          | 15 |
|          | Electrochemiluminescence | 1.05        | 0.001    | 0.036          | 1.12     | 0.97     | 99.88          | 2  |

**B**

| MCI      | Assay                    | Effect size | Variance | Standard error | Upper CI | Lower CI | I <sup>2</sup> | n  |
|----------|--------------------------|-------------|----------|----------------|----------|----------|----------------|----|
| p-tau181 | Simoa                    | 1.46        | 0.037    | 0.193          | 1.84     | 1.08     | 95.30          | 7  |
|          | IMR                      | 1.28        | 0.066    | 0.257          | 1.79     | 0.78     | 91.16          | 4  |
| t-tau    | Simoa                    | 1.11        | 0.002    | 0.041          | 1.19     | 1.03     | 99.33          | 6  |
|          | ELISA                    | 0.99        | 0.000    | 0.020          | 1.02     | 0.95     | 99.84          | 5  |
|          | IMR                      | 1.95        | 0.024    | 0.154          | 2.25     | 1.65     | 99.33          | 11 |
|          | Electrochemiluminescence | 1.09        | 0.127    | 0.356          | 1.79     | 0.39     | 96.33          | 2  |

**Table S3.** Meta-analysis based on individual technology for both t-tau and p-tau181 in AD compared with CU (A) and MCI compared with CU (B). IMR: Immunomagnetic resonance, CI: Confidence interval, I<sup>2</sup>: a measure of inconsistency which represents the percentage of the chi-squared statistic not explained by the variation within the studies.



## Quality Assessment

| Study                             | 1 | 2 | 3 | 4 | 5 | 6 | 7 | 8 | 9 | 10 | 11 | 12 | 13 | 14 | 15 | 16 | 17   | 18 | Control                                      |
|-----------------------------------|---|---|---|---|---|---|---|---|---|----|----|----|----|----|----|----|------|----|----------------------------------------------|
| Karikari <i>et al.</i> , (2020)   | Y | Y | Y | Y | Y | Y | Y | Y | Y | U  | U  | Y  | NA | NA | Y  | Y  | Y    | Y  | Age-matched controls                         |
| Chiu <i>et al.</i> , (2020)       | Y | Y | Y | Y | Y | Y | Y | Y | Y | U  | U  | Y  | NA | NA | Y  | Y  | N    | Y  | Age-matched controls                         |
| de Wolf <i>et al.</i> , (2020)    | Y | Y | Y | Y | Y | Y | Y | Y | Y | U  | U  | Y  | NA | NA | N  | Y  | Y    | Y  | Age-matched controls                         |
| Janelidze <i>et al.</i> , (2020)  | Y | N | Y | Y | Y | Y | Y | Y | Y | U  | U  | Y  | NA | NA | N  | Y  | Y    | Y  | Age-matched controls and post-mostem         |
| Palmqvist <i>et al.</i> , (2019)  | Y | Y | Y | Y | Y | Y | Y | Y | Y | U  | U  | Y  | NA | NA | Y  | Y  | Y    | Y  | Age-matched controls                         |
| Pase <i>et al.</i> , (2019)       | Y | Y | Y | Y | Y | Y | Y | Y | Y | U  | U  | Y  | NA | NA | N  | Y  | N    | Y  | Age-matched controls                         |
| Li <i>et al.</i> , (2019)         | Y | Y | Y | Y | Y | Y | Y | Y | Y | U  | U  | Y  | NA | NA | N  | Y  | N    | Y  | Age-matched controls                         |
| Chen <i>et al.</i> , (2019)       | Y | Y | Y | Y | Y | Y | Y | Y | Y | U  | U  | Y  | NA | NA | N  | Y  | Y    | Y  | Age-matched controls                         |
| Neergaard <i>et al.</i> , (2018)  | Y | N | Y | Y | Y | Y | Y | Y | Y | U  | U  | Y  | NA | NA | N  | Y  | N    | Y  | Age-matched controls (post-menopausal women) |
| Tatebe <i>et al.</i> , (2017)     | Y | Y | Y | Y | Y | Y | Y | Y | Y | U  | U  | Y  | NA | NA | N  | Y  | Y    | Y  | Age-matched controls                         |
| Mattsson <i>et al.</i> , (2016)   | Y | Y | Y | Y | Y | Y | Y | Y | Y | U  | U  | Y  | NA | NA | N  | Y  | Y    | Y  | Age-matched controls                         |
| Sparks <i>et al.</i> , (2012)     | Y | N | Y | Y | Y | Y | Y | Y | Y | U  | U  | Y  | NA | NA | N  | N  | N    | N  | Age-matched controls                         |
| Chiu <i>et al.</i> , (2013)       | Y | N | Y | Y | Y | Y | Y | Y | Y | U  | U  | Y  | NA | NA | N  | N  | Y    | Y  | Age-matched controls                         |
| Zetterberg <i>et al.</i> , (2013) | Y | N | Y | Y | Y | Y | Y | Y | Y | U  | U  | Y  | NA | NA | N  | Y  | N    | Y  | Age-matched controls                         |
| Wang <i>et al.</i> , (2014)       | Y | Y | Y | Y | Y | Y | Y | Y | Y | U  | U  | Y  | NA | NA | N  | N  | Some | Y  | Age-matched controls                         |
| Chiu <i>et al.</i> , (2014)       | Y | Y | Y | Y | Y | Y | Y | Y | Y | U  | U  | Y  | NA | NA | N  | N  | Y    | N  | Age-matched controls                         |
| Mielke <i>et al.</i> , (2018)     | Y | N | Y | Y | Y | Y | Y | Y | Y | U  | U  | Y  | NA | NA | Y  | Y  | N    | Y  | Age-matched controls                         |
| Yanga <i>et al.</i> , (2018)      | Y | Y | Y | Y | Y | Y | Y | Y | Y | U  | U  | Y  | NA | NA | N  | Y  | Y    | Y  | Age-matched controls                         |
| Park <i>et al.</i> , (2019)       | Y | Y | Y | Y | Y | Y | Y | Y | Y | U  | U  | Y  | NA | NA | N  | Y  | N    | Y  | Age-matched controls                         |
| Jiao <i>et al.</i> , (2015)       | Y | Y | Y | Y | Y | Y | Y | Y | Y | U  | U  | Y  | NA | NA | Y  | Y  | Y    | Y  | Age-matched controls                         |
| de Vos <i>et al.</i> , (2015)     | Y | Y | Y | Y | Y | Y | Y | Y | Y | U  | U  | Y  | NA | NA | N  | Y  | Y    | Y  | Age-matched controls                         |
| Park <i>et al.</i> , (2019)       | Y | Y | Y | Y | Y | Y | Y | Y | Y | U  | U  | Y  | NA | NA | N  | Y  | N    | Y  | Age-matched controls                         |
| Nam <i>et al.</i> , (2020)        | Y | Y | Y | Y | Y | Y | Y | Y | Y | U  | U  | Y  | NA | NA | N  | N  | Y    | Y  | Age-matched controls                         |
| Chen <i>et al.</i> , (2020)       | N | Y | Y | Y | Y | Y | Y | Y | Y | U  | U  | Y  | NA | NA | N  | N  | N    | Y  | Age-matched controls                         |

| <b>Study</b>                             | <b>1</b> | <b>2</b> | <b>3</b> | <b>4</b> | <b>5</b> | <b>6</b> | <b>7</b> | <b>8</b> | <b>9</b> | <b>10</b> | <b>11</b> | <b>12</b> | <b>13</b> | <b>14</b> | <b>15</b> | <b>16</b> | <b>17</b> | <b>18</b> | <b>Control</b>       |
|------------------------------------------|----------|----------|----------|----------|----------|----------|----------|----------|----------|-----------|-----------|-----------|-----------|-----------|-----------|-----------|-----------|-----------|----------------------|
| Rani <i>et al.</i> , (2017)              | Y        | Y        | Y        | Y        | Y        | Y        | Y        | Y        | Y        | U         | U         | Y         | NA        | NA        | N         | N         | Y         | Y         | Age-matched controls |
| Jiao <i>et al.</i> , (2020)              | Y        | Y        | Y        | Y        | Y        | Y        | Y        | Y        | Y        | U         | U         | Y         | NA        | NA        | N         | N         | Y         | Y         | Age-matched controls |
| Tsai <i>et al.</i> , (2020)              | Y        | Y        | Y        | Y        | Y        | Y        | Y        | Y        | Y        | U         | U         | Y         | NA        | NA        | N         | Y         | Y         | Y         | Age-matched controls |
| Hasegawa <i>et al.</i> , (2020)          | Y        | Y        | Y        | Y        | Y        | Y        | Y        | Y        | Y        | U         | U         | Y         | NA        | NA        | N         | N         | Y         | Y         | Age-matched controls |
| Tsai <i>et al.</i> , (2019)              | Y        | Y        | Y        | Y        | Y        | Y        | Y        | Y        | Y        | U         | U         | Y         | NA        | NA        | N         | Y         | N         | Y         | Age-matched controls |
| Fan <i>et al.</i> , (2018)               | Y        | Y        | Y        | Y        | Y        | Y        | Y        | Y        | Y        | U         | U         | Y         | NA        | NA        | N         | Y         | Y         | Y         | Age-matched controls |
| Yang <i>et al.</i> , (2017)              | Y        | Y        | Y        | Y        | Y        | Y        | Y        | Y        | Y        | U         | U         | Y         | NA        | NA        | N         | Y         | Y         | Y         | Age-matched controls |
| Lue <i>et al.</i> , (2017)               | Y        | Y        | Y        | Y        | Y        | Y        | Y        | Y        | Y        | U         | U         | Y         | NA        | NA        | N         | Y         | Y         | Y         | Age-matched controls |
| Lee <i>et al.</i> , (2017)               | Y        | Y        | Y        | Y        | Y        | Y        | Y        | Y        | Y        | U         | U         | Y         | NA        | NA        | N         | N         | N         | Y         | Age-matched controls |
| Barthélemy <i>et al.</i> , (2020)        | Y        | Y        | Y        | Y        | Y        | Y        | Y        | Y        | Y        | U         | U         | Y         | NA        | NA        | N         | Y         | Y         | N         | Age-matched controls |
| Tzen <i>et al.</i> , (2014)              | Y        | Y        | Y        | Y        | Y        | Y        | Y        | Y        | Y        | U         | U         | Y         | NA        | NA        | N         | N         | N         | Y         | Age-matched controls |
| Palmqvist <i>et al.</i> , (2020)         | Y        | Y        | Y        | Y        | Y        | Y        | Y        | Y        | Y        | U         | U         | Y         | NA        | NA        | N         | N         | Y         | Y         | Age-matched controls |
| Mattsson-Carlgrén <i>et al.</i> , (2020) | Y        | Y        | Y        | Y        | Y        | Y        | Y        | Y        | Y        | U         | U         | Y         | NA        | Y         | N         | N         | Y         | Y         | Age-matched controls |
| Zettergren <i>et al.</i> , (2021)        | Y        | N        | Y        | Y        | Y        | Y        | Y        | Y        | Y        | U         | U         | Y         | NA        | NA        | N         | N         | N         | Y         | Age-matched controls |
| Hsu <i>et al.</i> , (2021)               | Y        | Y        | Y        | Y        | Y        | Y        | Y        | Y        | Y        | U         | U         | Y         | NA        | NA        | Y         | Y         | N         | Y         | Age-matched controls |
| Karikari <i>et al.</i> , (2021)          | Y        | Y        | Y        | Y        | Y        | Y        | Y        | Y        | Y        | U         | U         | Y         | NA        | NA        | N         | N         | Y         | Y         | Age-matched controls |
| Simren <i>et al.</i> , (2021)            | Y        | Y        | Y        | Y        | Y        | Y        | Y        | Y        | Y        | U         | U         | Y         | NA        | NA        | N         | Y         | Y         | Y         | Age-matched controls |
| Deniz <i>et al.</i> , (2021)             | N        | Y        | Y        | Y        | Y        | Y        | Y        | Y        | Y        | U         | U         | Y         | NA        | NA        | N         | Y         | N         | Y         | Age-matched controls |
| Ashton <i>et al.</i> , (2021)            | Y        | Y        | Y        | Y        | Y        | Y        | Y        | Y        | Y        | U         | U         | Y         | NA        | NA        | N         | Y         | Y         | Y         | Age-matched controls |
| Brickman <i>et al.</i> , (2021)          | Y        | Y        | Y        | Y        | Y        | Y        | Y        | Y        | Y        | U         | U         | Y         | NA        | NA        | N         | N         | Y         | Y         | Age-matched controls |
| O'Connor <i>et al.</i> , (2020)          | Y        | Y        | Y        | Y        | Y        | Y        | Y        | Y        | Y        | U         | U         | Y         | NA        | NA        | N         | Y         | Y         | Y         | Age-matched controls |
| Benussi <i>et al.</i> , (2020)           | Y        | Y        | Y        | Y        | Y        | Y        | Y        | Y        | Y        | U         | U         | Y         | NA        | NA        | N         | Y         | Y         | Y         | Age-matched controls |
| Lantero Rodriguez <i>et al.</i> , (2020) | Y        | Y        | Y        | Y        | Y        | Y        | Y        | Y        | Y        | U         | U         | Y         | NA        | NA        | N         | Y         | Y         | Y         | Age-matched controls |
| Startin <i>et al.</i> , (2019)           | Y        | Y        | Y        | Y        | Y        | Y        | Y        | Y        | Y        | U         | U         | Y         | NA        | NA        | N         | N         | N         | Y         | Age-matched controls |
| Fossati <i>et al.</i> , (2020)           | Y        | Y        | Y        | Y        | Y        | Y        | Y        | Y        | Y        | U         | U         | Y         | NA        | NA        | N         | Y         | Y         | Y         | Age-matched controls |

**Table S4.** Quality assessment form. Questions were obtained from QUADAS, AMSTAR and STARD.

## QUADAS modified

- 1 Was the spectrum of participants representative of the patients who will receive the test in practice? Yes No Unclear N/A
- 2 Were selection criteria clearly described? Yes No Unclear N/A
- 3 Was the reference standard likely to classify the target condition correctly? Yes No Unclear N/A
- 4 Was the period between performance of the reference standard and the index test short enough to be reasonably sure that the target condition did not change between the two tests? Yes No Unclear N/A
- 5 Did the whole sample or a random selection of the sample receive verification using the reference standard? Yes No Unclear N/A
- 6 Did participants receive the same reference standard regardless of the index test result? Yes No Unclear N/A
- 7 Was the reference standard independent of the index test? (that is, the index test did not form part of the reference standard)? Yes No Unclear N/A
- 8 Was the execution of the index test described in sufficient detail to permit its replication? Yes No Unclear N/A
- 9 Was the execution of the reference standard described in sufficient detail to permit its replication? Yes No Unclear N/A
- 10 Were the index test results interpreted without knowledge of the results of the reference standard? Yes No Unclear N/A
- 11 Were the reference standard results interpreted without knowledge of the results of the index test? Yes No Unclear N/A
- 12 Were the same clinical data available when the test results were interpreted as would be available when the test is used in practice? Yes No Unclear N/A
- 13 Were uninterpretable, indeterminate or intermediate test results reported? Yes No Unclear N/A
- 14 Were withdrawals from the study explained? Yes No Unclear N/A
- 15 Were the number, training, and expertise of the persons executing and reading the index tests and the reference standard described? Yes No Unclear N/A
- 16 Were methods for calculating test reproducibility described? Yes No Unclear N/A
- 17 Were estimates of diagnostic accuracy and measures of statistical uncertainty (e.g., 95% confidence intervals) reported? Yes No Unclear N/A
- 18 Was the conflict of interest stated? Yes No Unclear N/A

**Table S5.** Modified QUADAS questions.

**A**

$$95\%CI = \exp \left\{ \left[ \ln \left( \frac{mean_{exp}}{mean_{contr}} \right) \right] \pm 1.96 \sqrt{\frac{1}{n_{exp}} \left( \frac{sd_{exp}}{mean_{exp}} \right)^2 + \frac{1}{n_{contr}} \left( \frac{sd_{contr}}{mean_{contr}} \right)^2} \right\}$$

**B**

|           |                                                                                                                                              |
|-----------|----------------------------------------------------------------------------------------------------------------------------------------------|
| <b>1</b>  | $\Theta_{IV(FE)} = \frac{\sum_{i=1,k} w_i \times \Theta_i}{\sum_{i=1,k} w_i}$                                                                |
| <b>2</b>  | $Q = \sum_{i=1,k} w_i \times (\Theta_i - \Theta_{IV(FE)})^2$                                                                                 |
|           | which has a $\chi^2$ distribution with k-1 degrees of freedom when $\tau^2 = 0$ . An estimate of $\tau^2$ follows:                           |
| <b>3a</b> | $t^2 = \frac{Q - (k-1)}{\sum_{i=1,k} w_i - \frac{\sum_{i=1,k} (w_i)^2}{\sum_{i=1,k} w_i}}$ if $Q \geq k-1$ , and                             |
| <b>3b</b> | $t^2 = 0$ if $Q < k-1$                                                                                                                       |
| <b>4</b>  | $w_i^* = 1 / (w_i^{-1} + \tau^2)$                                                                                                            |
| <b>5</b>  | $\Theta_{IV(RE)} = \frac{\sum_{i=1,k} w_i^* \times \Theta_i}{\sum_{i=1,k} w_i^*}$ with variance $(\Theta_{IV(RE)}) = 1 / \sum_{i=1,k} w_i^*$ |

**Figure S1.** Equations used to carry out each meta-analysis. **A.** The 95% CI was calculated taking the exponent (exp) of the natural log (ln) or the ratio of the means of experiment (exp, disease cohort) over control (contr) plus or minus the square root of the variance. **B.** Random effects model to calculate overall effect size from studies pooled in each meta-analysis. The numbers on the margin provide guidance on the steps involved. FE: fixed effects. RE: random effects. IV: inverse variance. i: study number (1 to k). k: number of trials in each meta-analysis. n: number of participants. Q: Cochran's Q statistic for heterogeneity. sd: standard deviation. wi: weighting of study i. wi\*: weighting of study i incorporating the variance due to heterogeneity.  $\Theta$ : effect size. Figure adapted from Friedrich et al., (2008).
